# Supplementary figures and images for: Nanoporous metal formates for krypton/xenon separation
Source: Royal Society of Chemistry journal article supplement (doi:10.1039/c3cc44374d), 2013-01-01

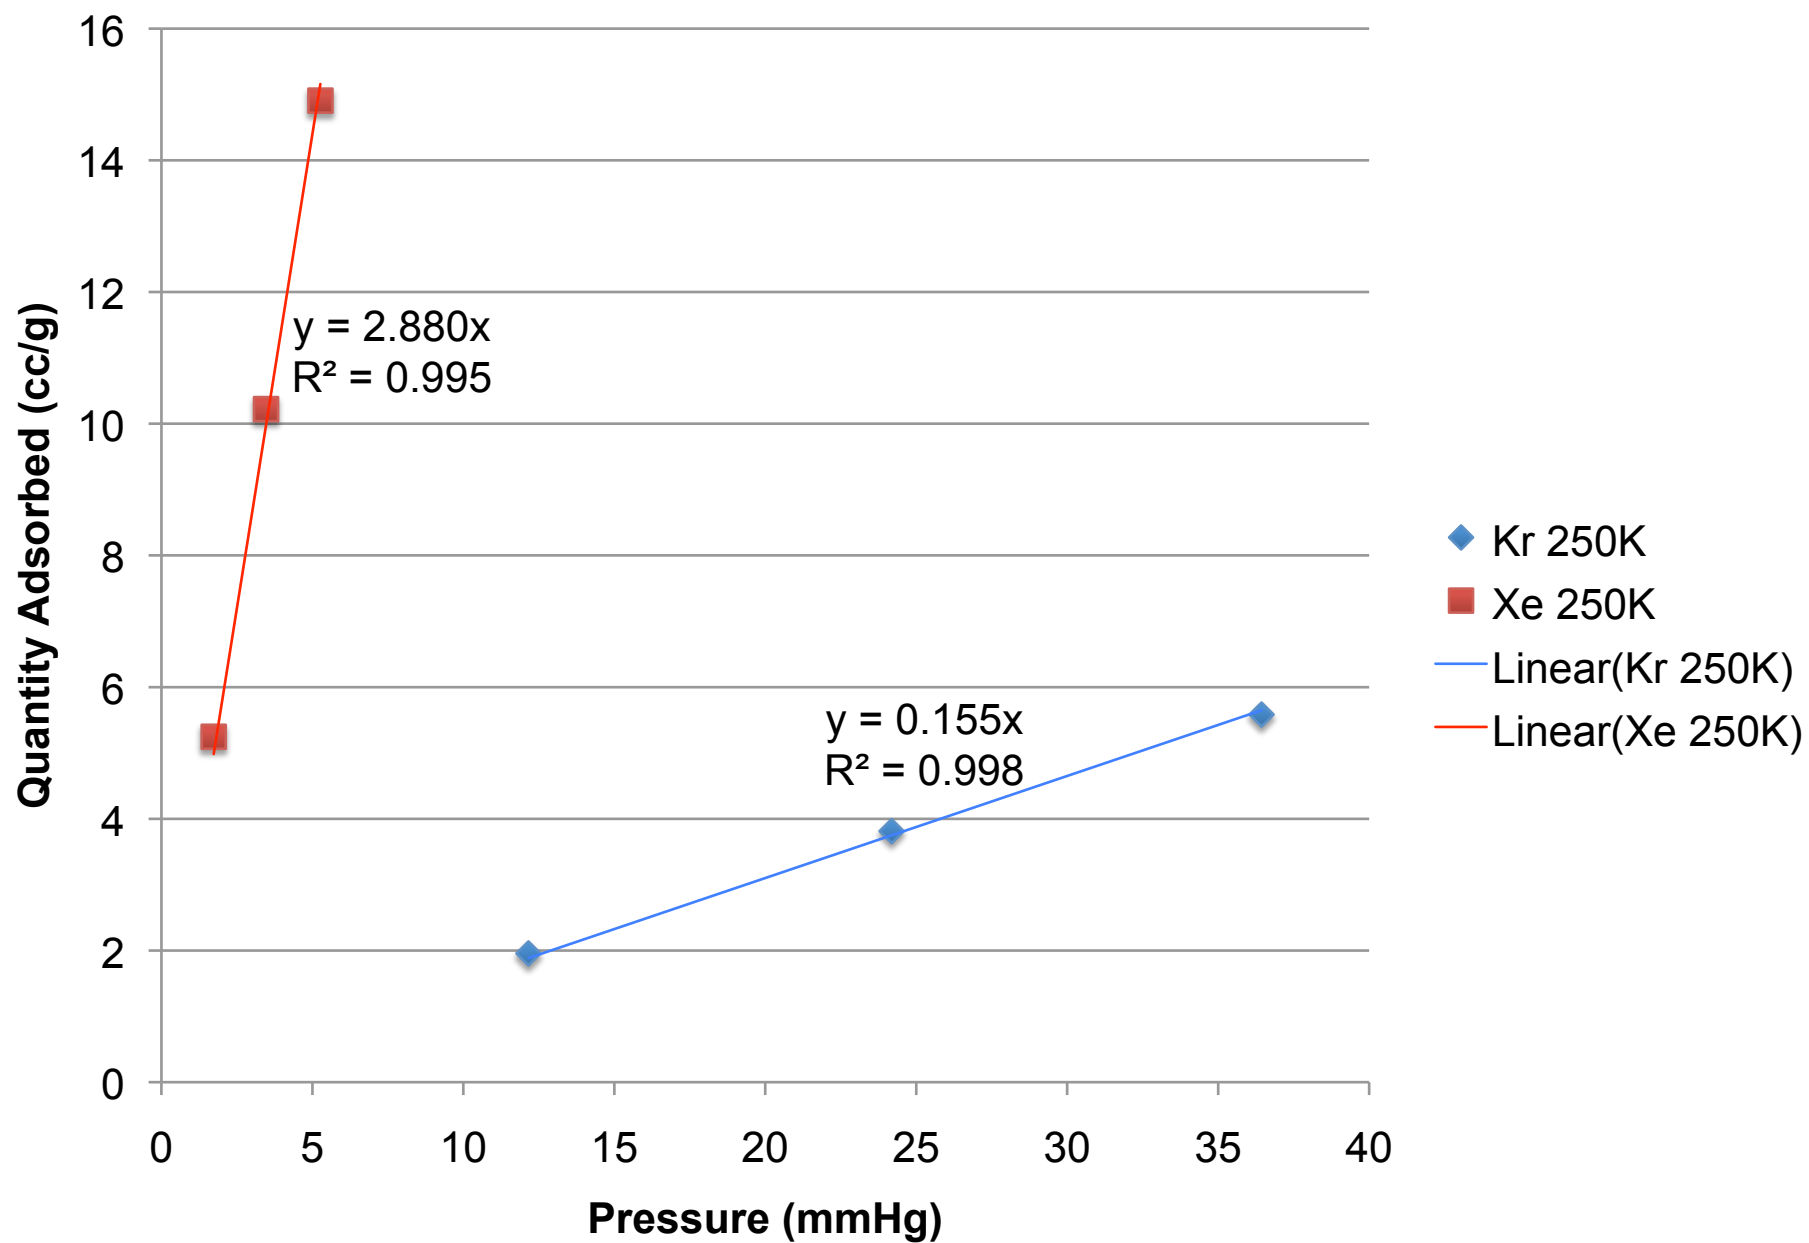

Supplement: c3cc44374d_2.zip [file c3cc44374d_2.zip]

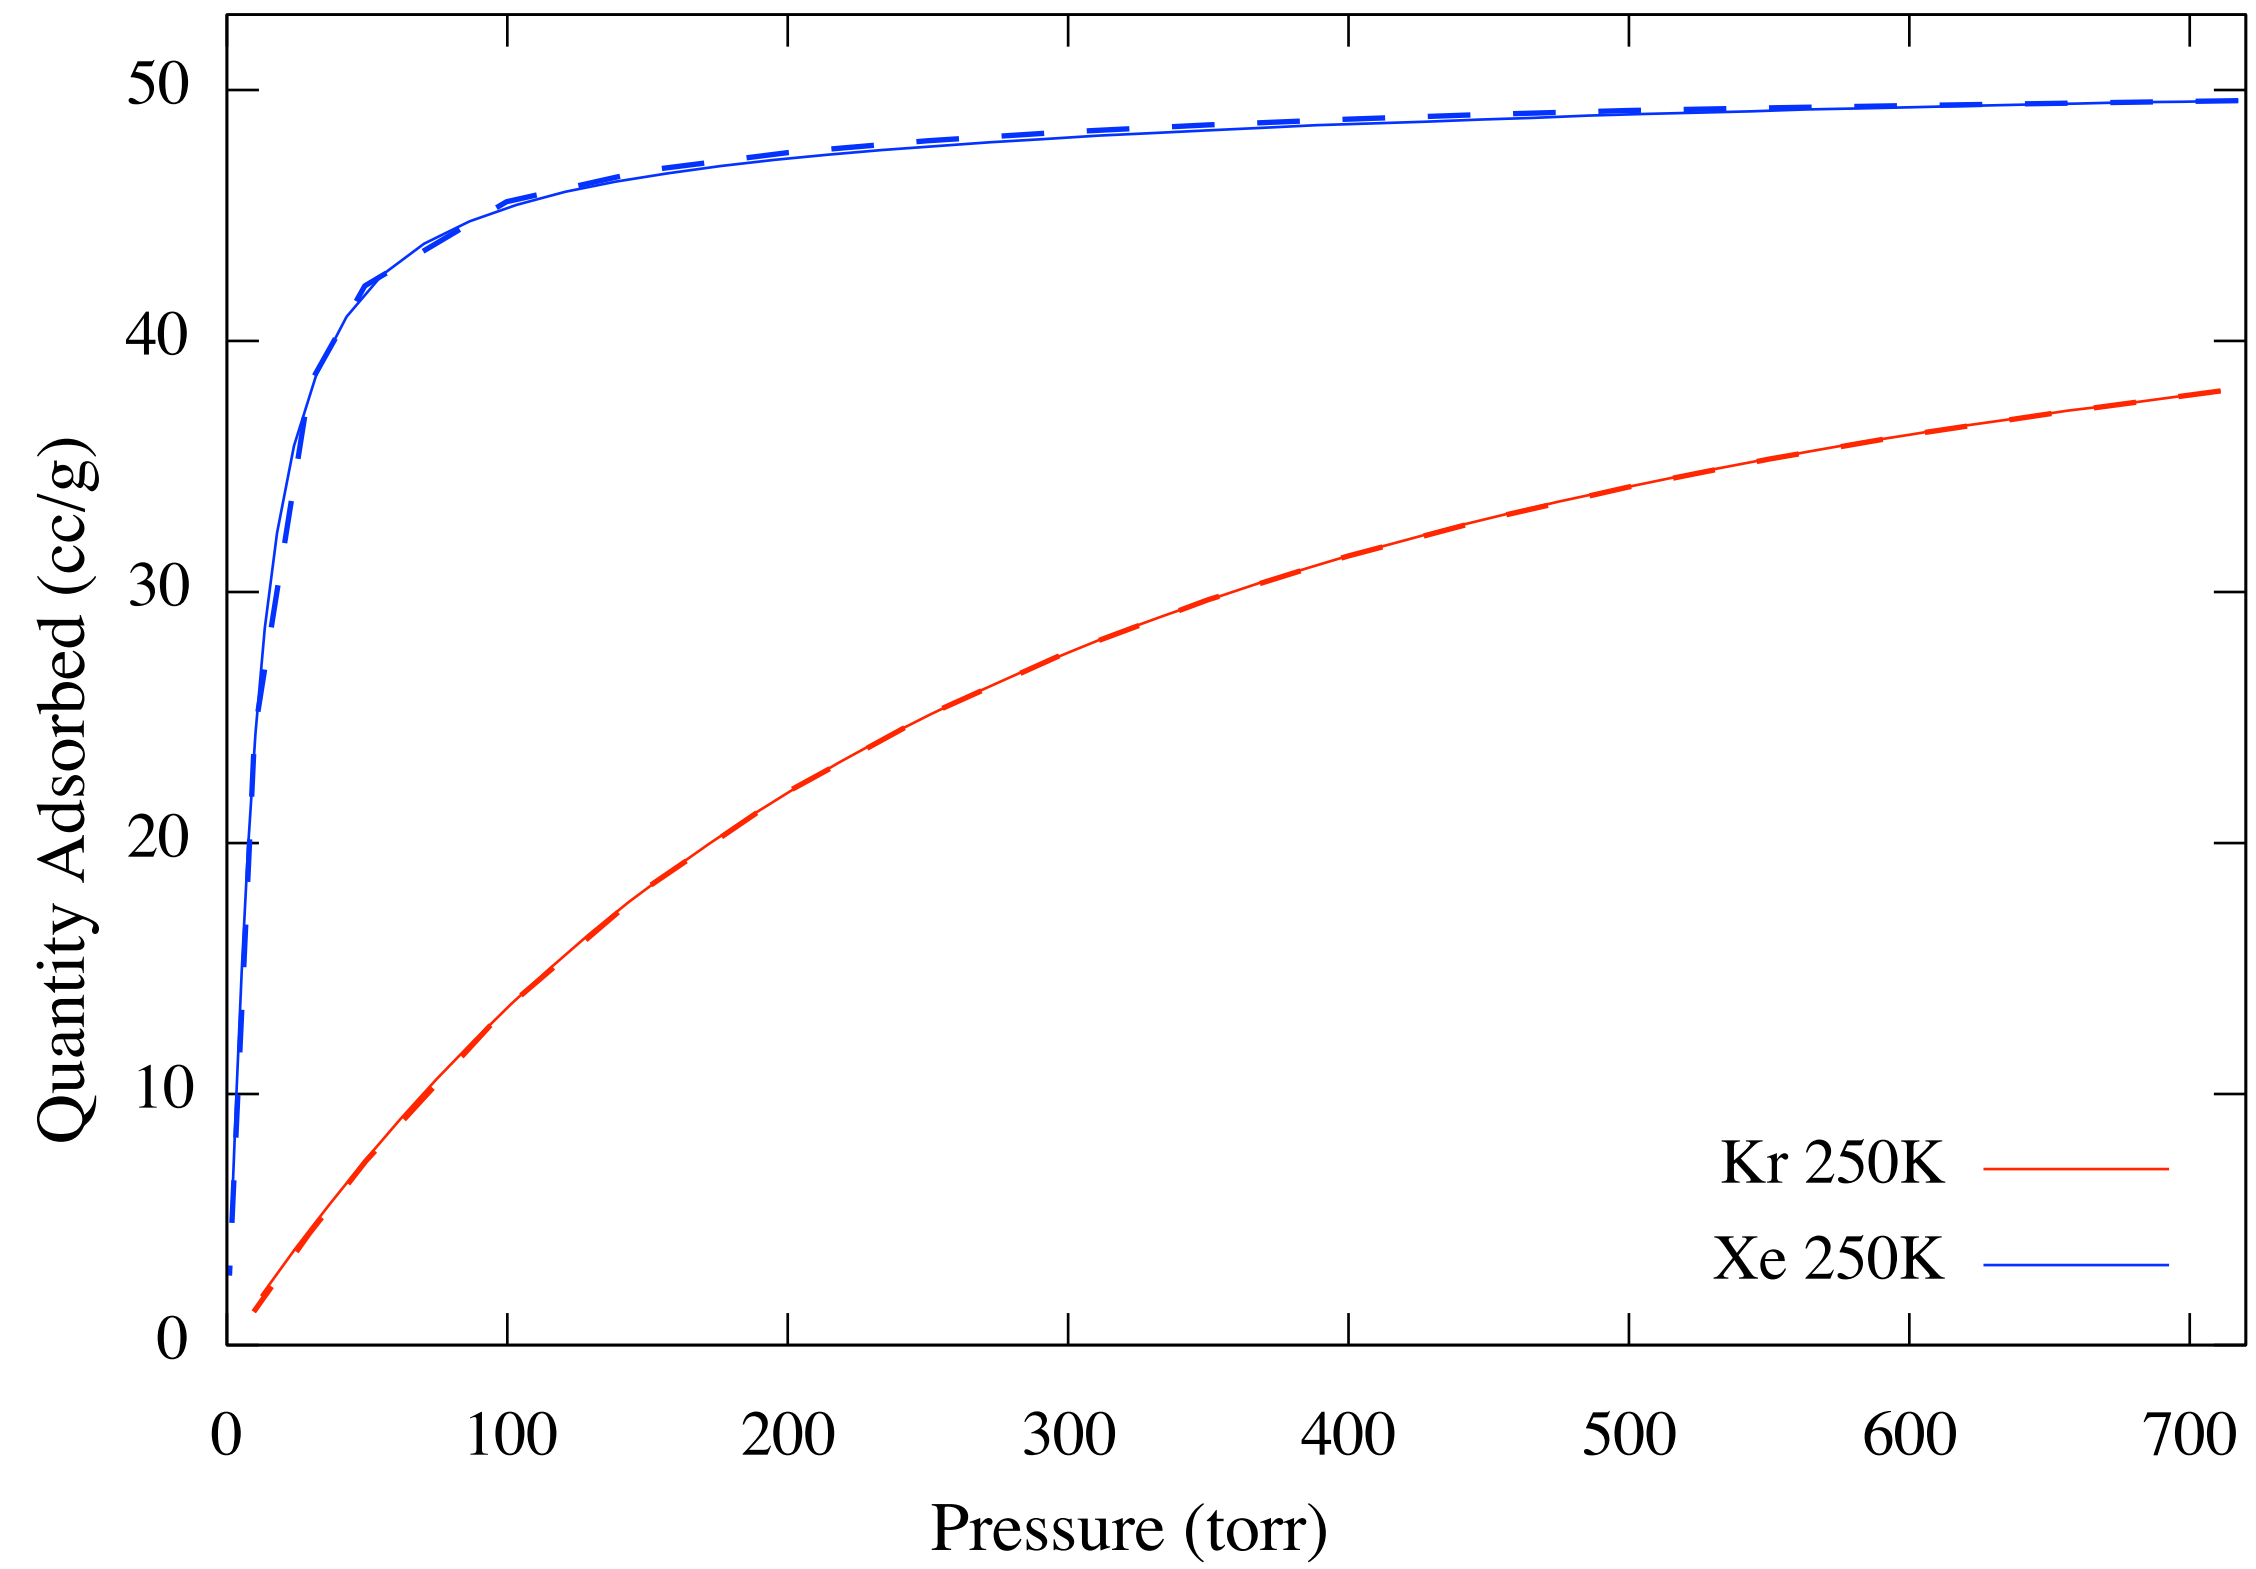

Supplement: c3cc44374d_2.zip [file c3cc44374d_2.zip]

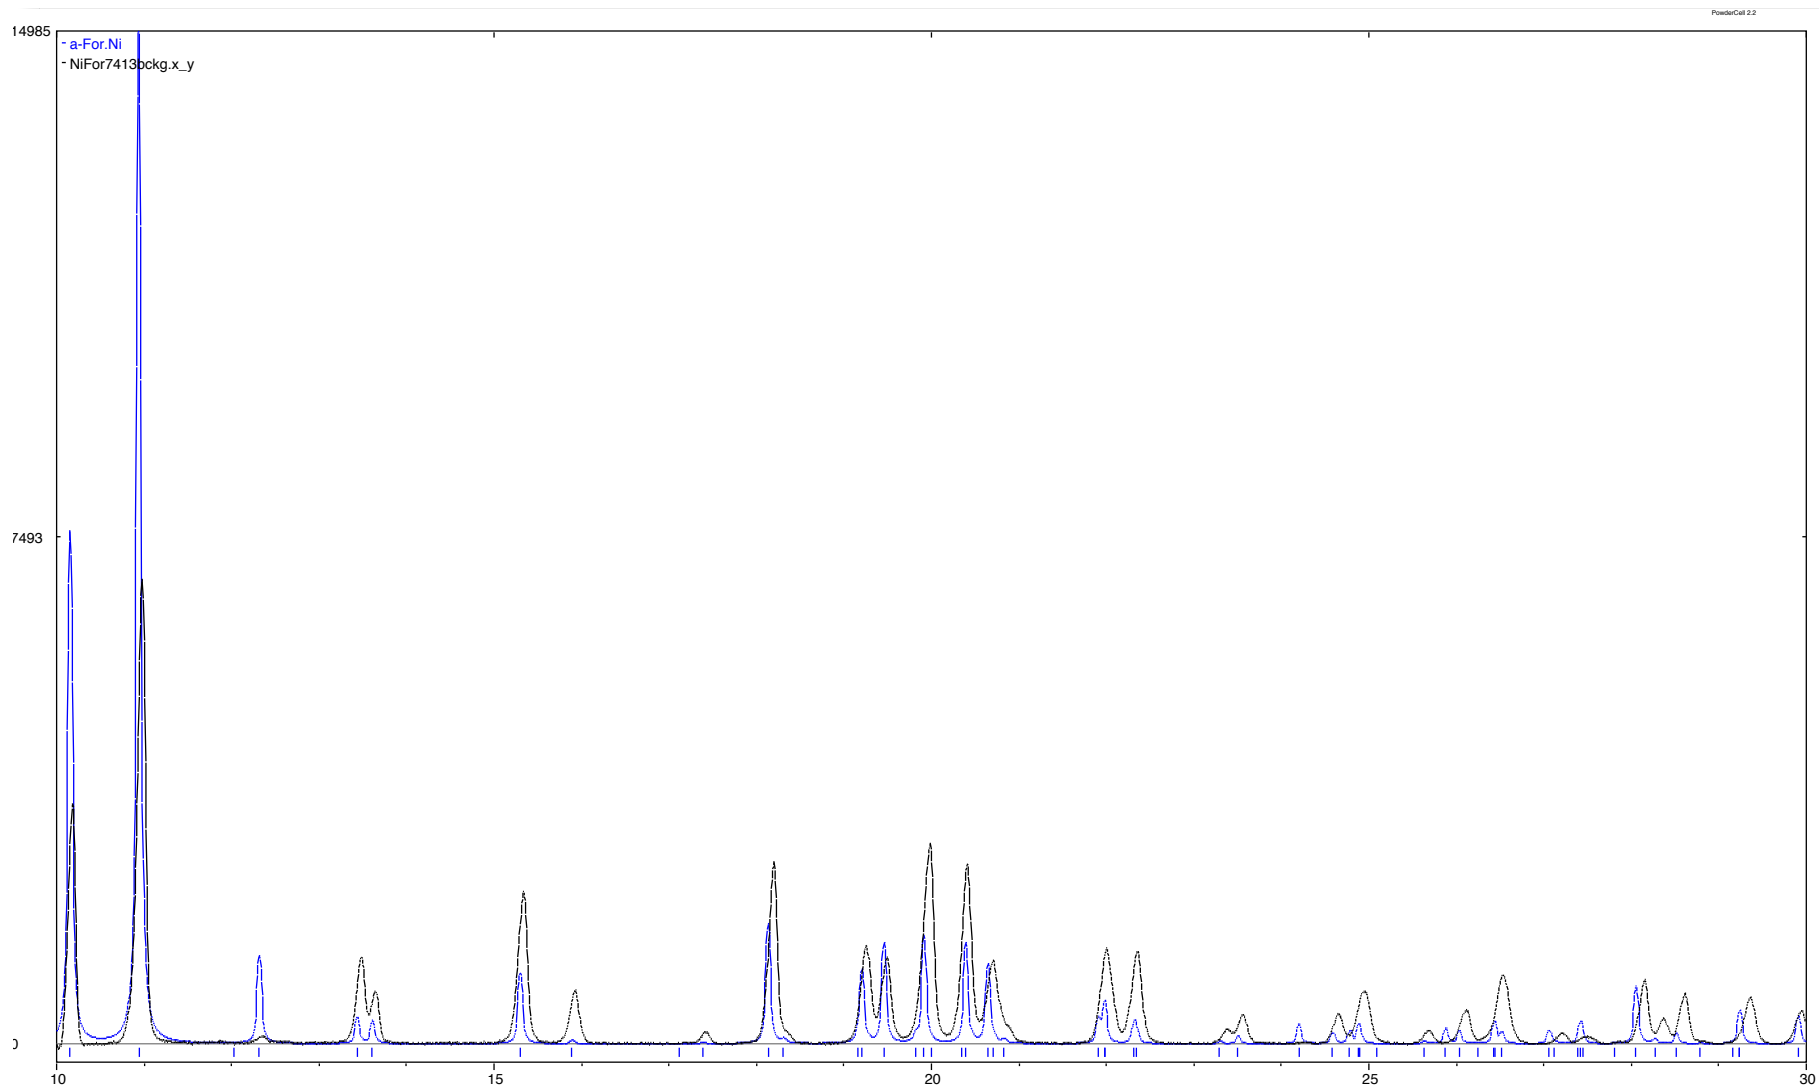

Supplement: c3cc44374d_2.zip [file c3cc44374d_2.zip]

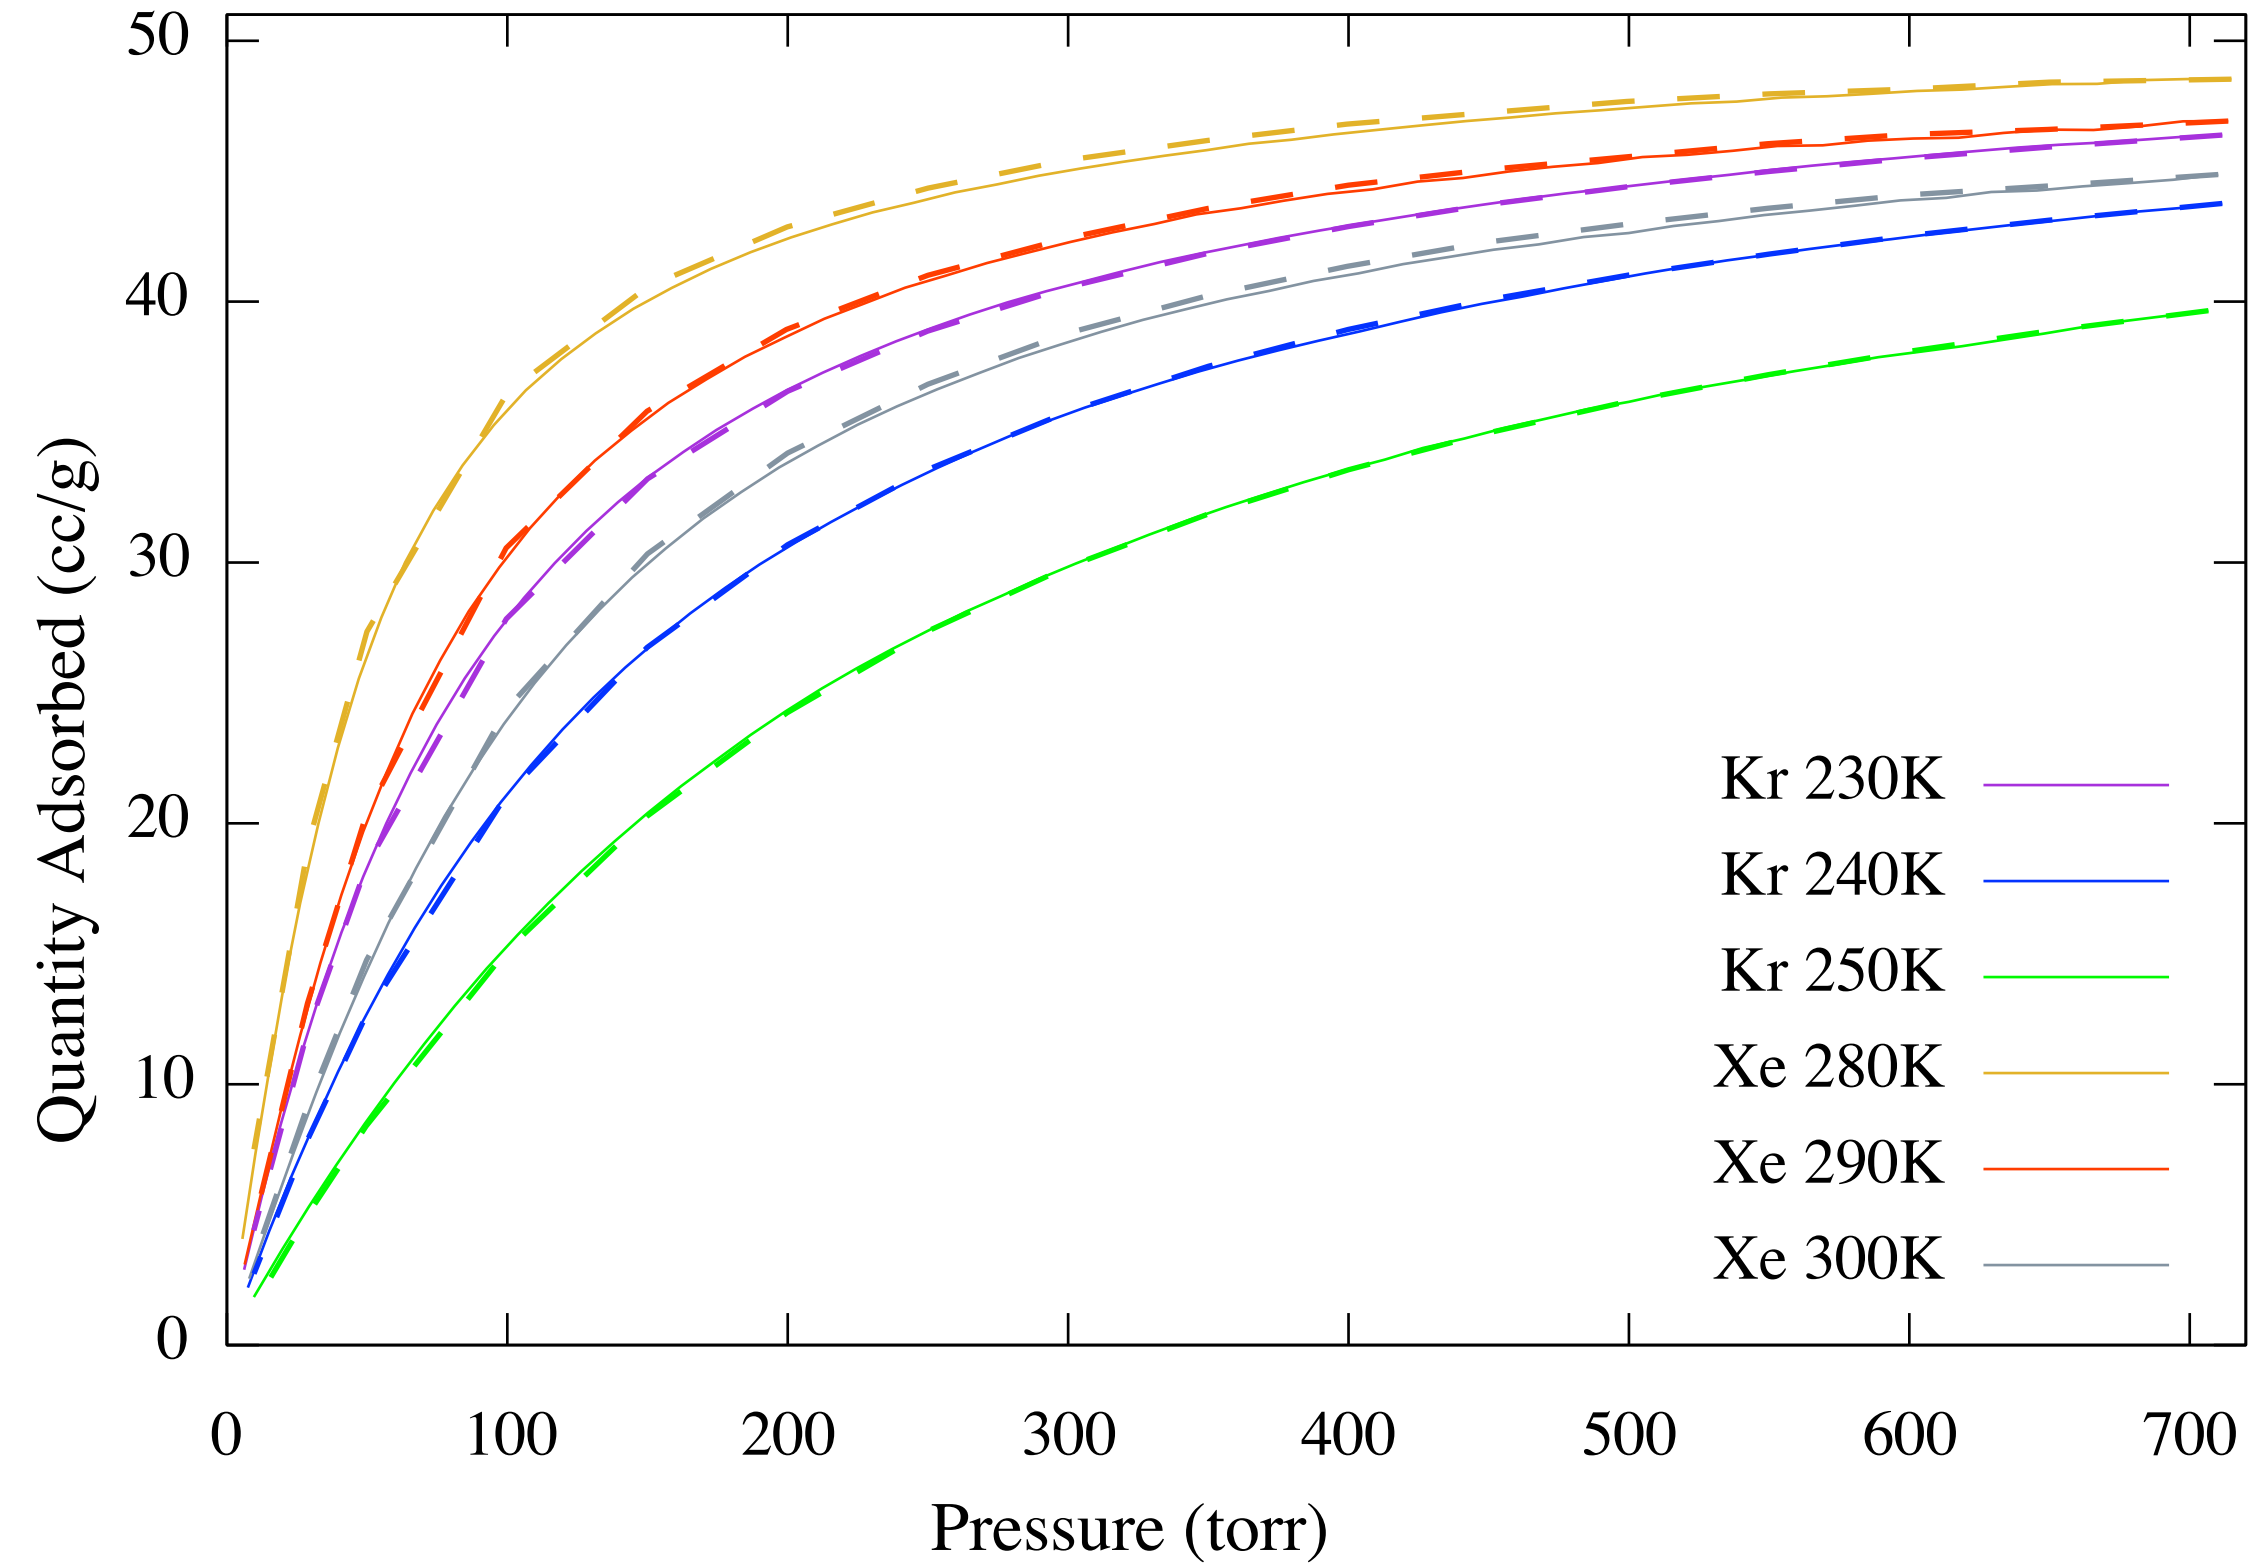

Supplement: c3cc44374d_2.zip [file c3cc44374d_2.zip]

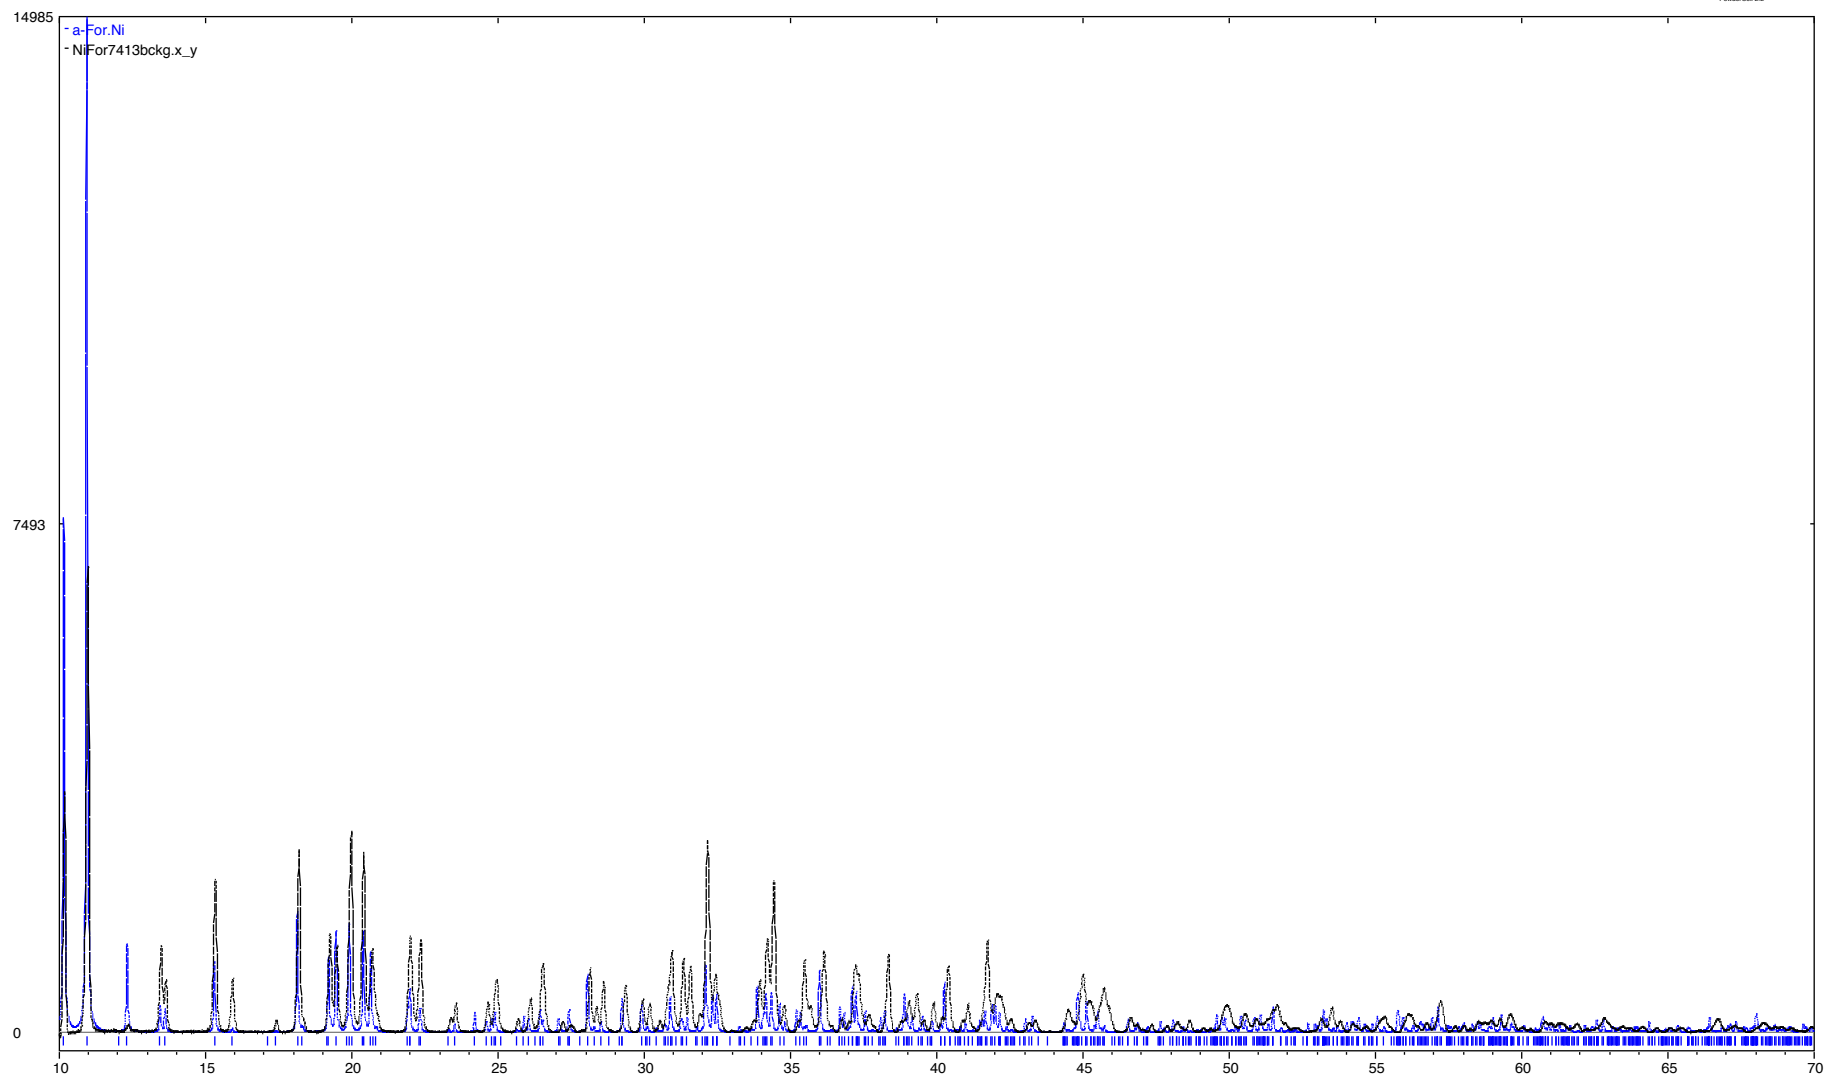

Supplement: c3cc44374d_2.zip [file c3cc44374d_2.zip]

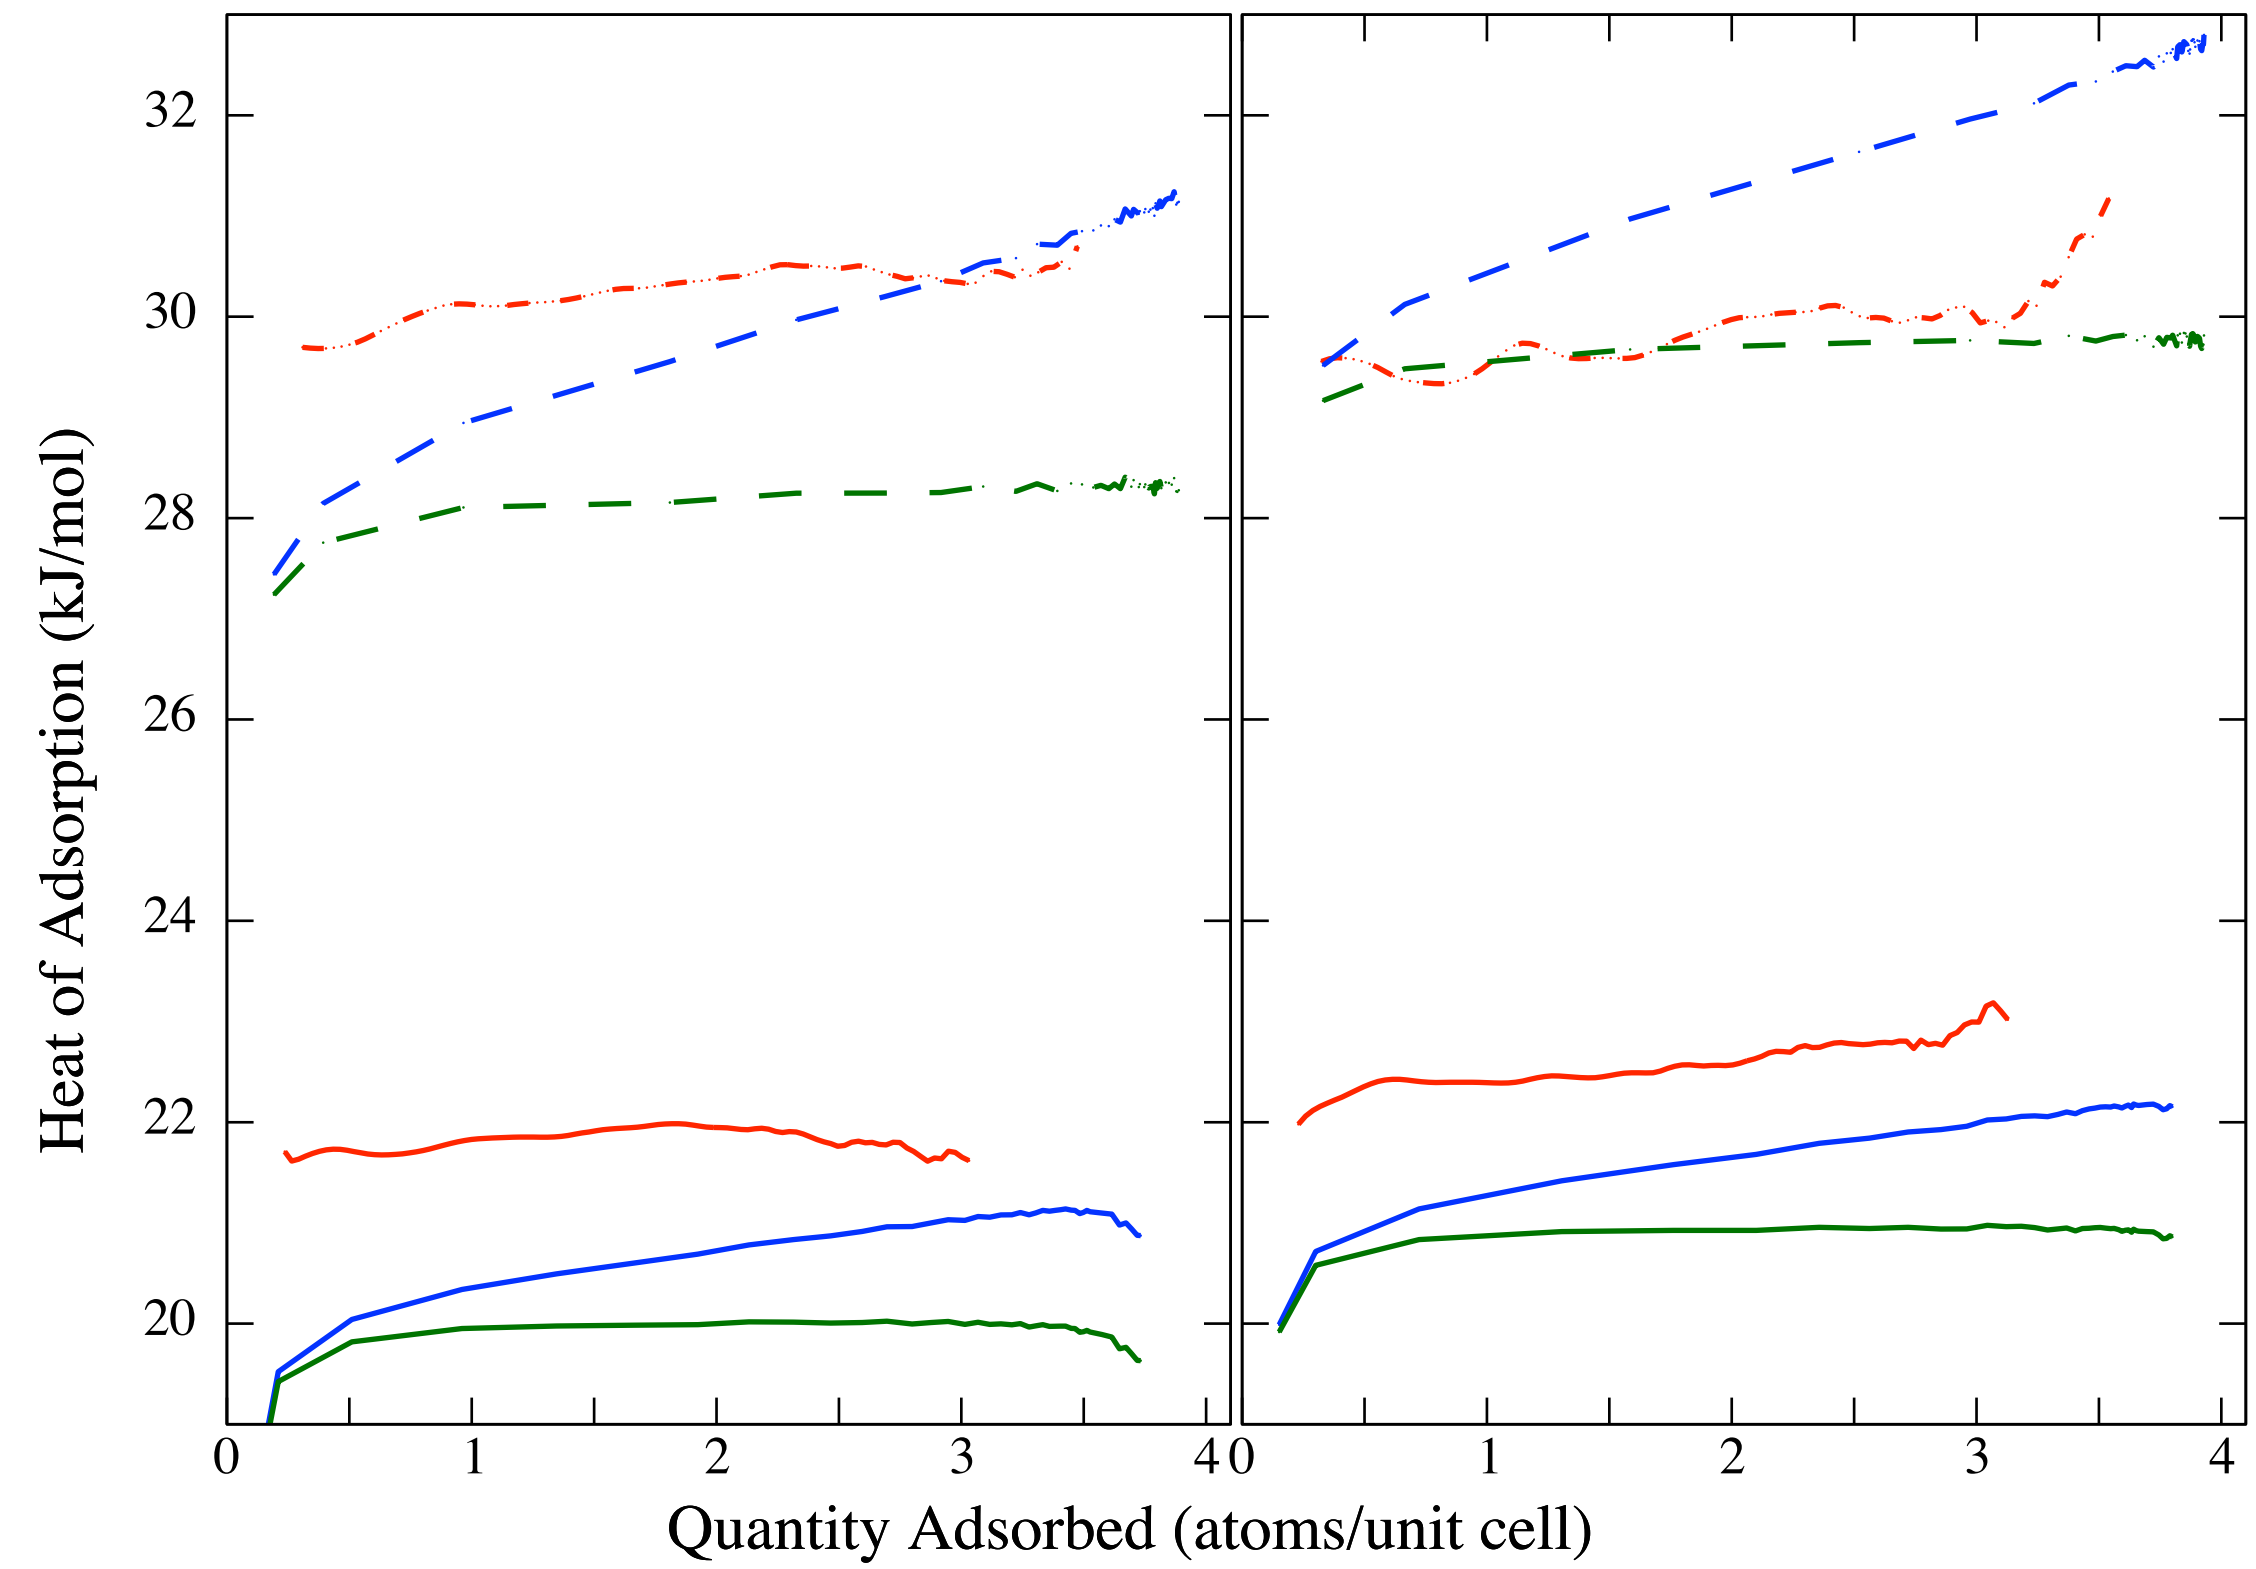

Supplement: c3cc44374d_2.zip [file c3cc44374d_2.zip]

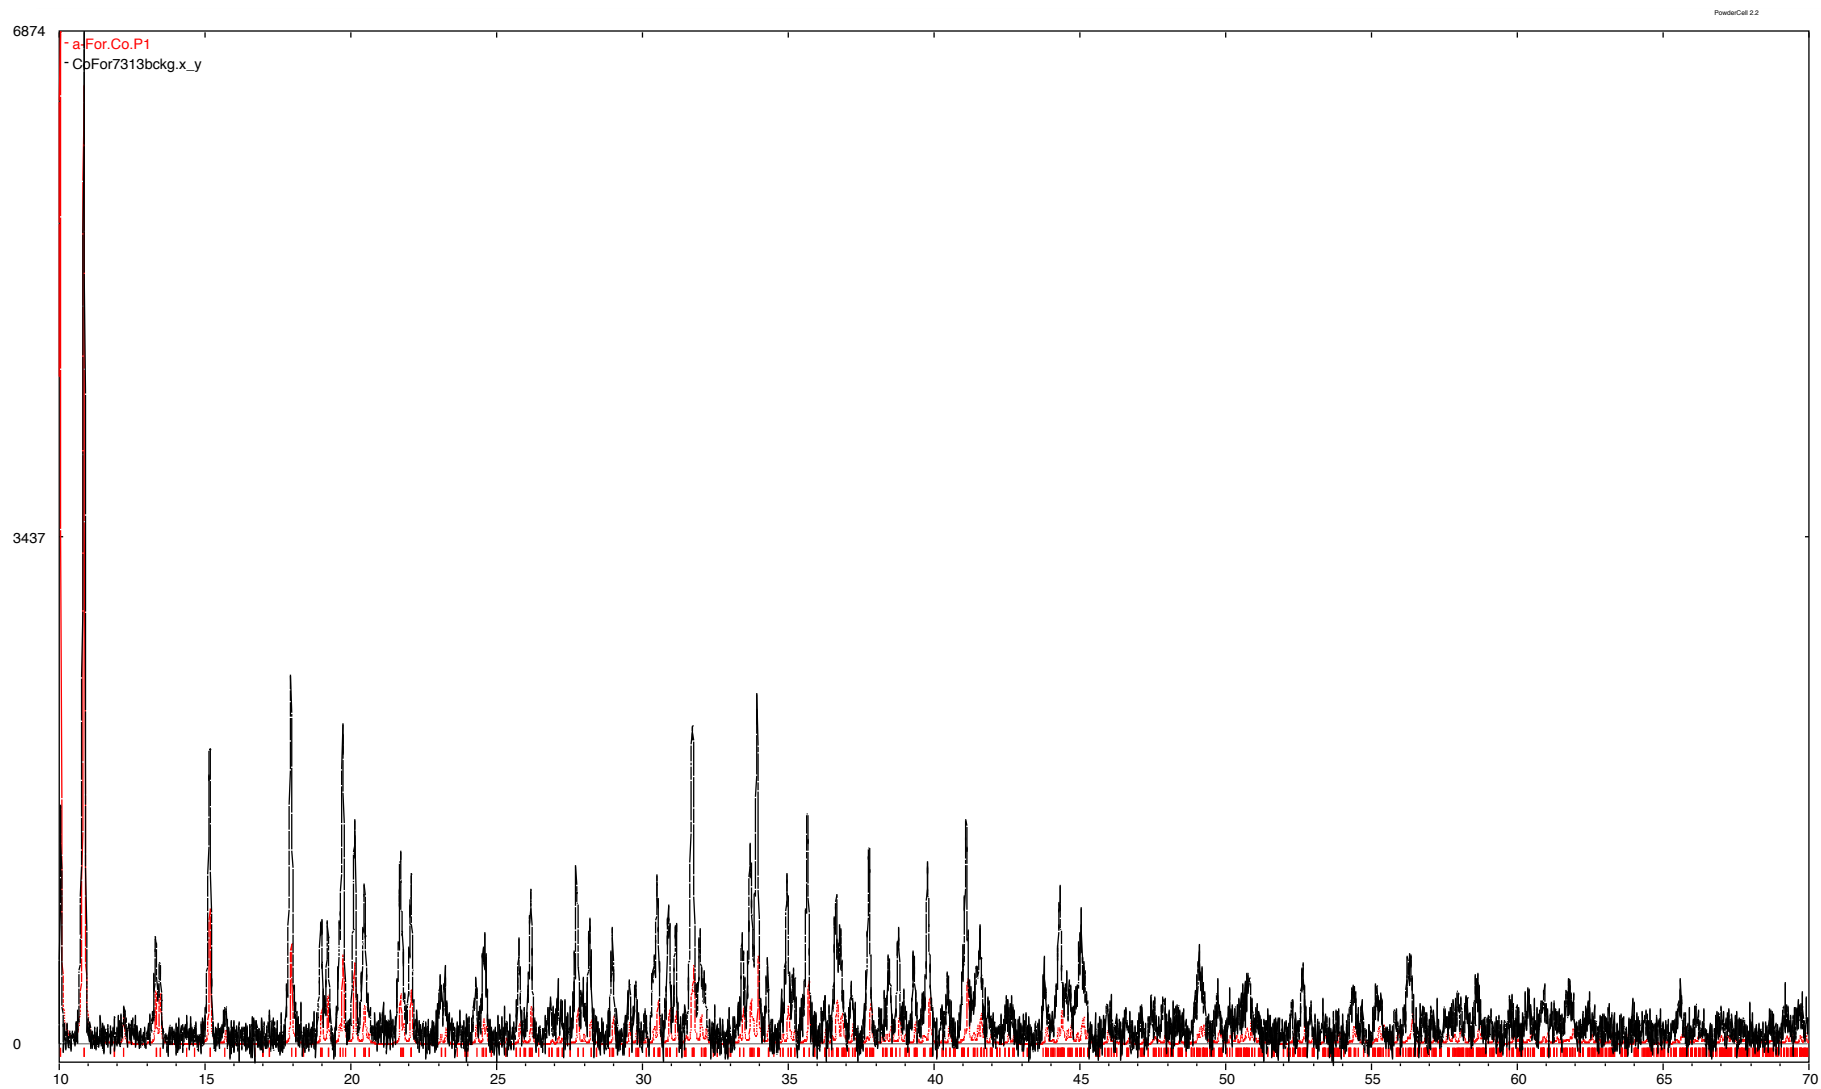

Supplement: c3cc44374d_2.zip [file c3cc44374d_2.zip]

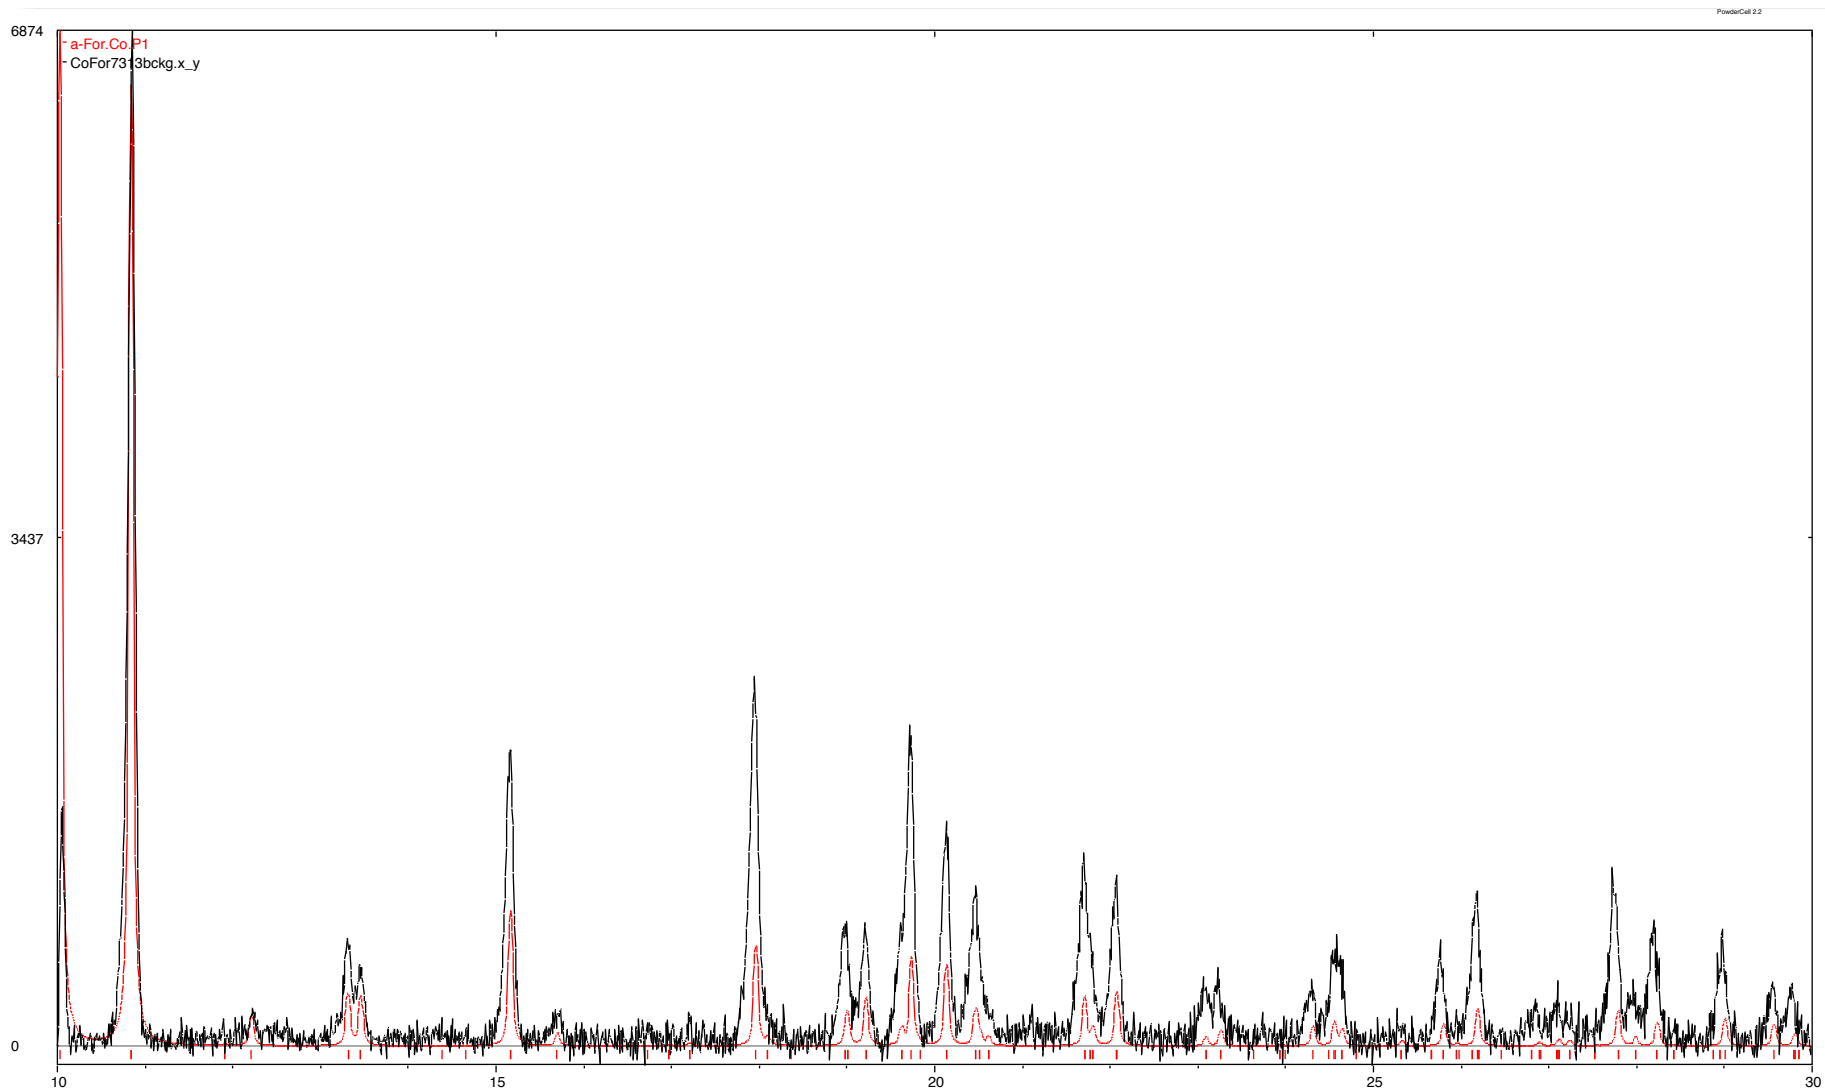

Supplement: c3cc44374d_2.zip [file c3cc44374d_2.zip]

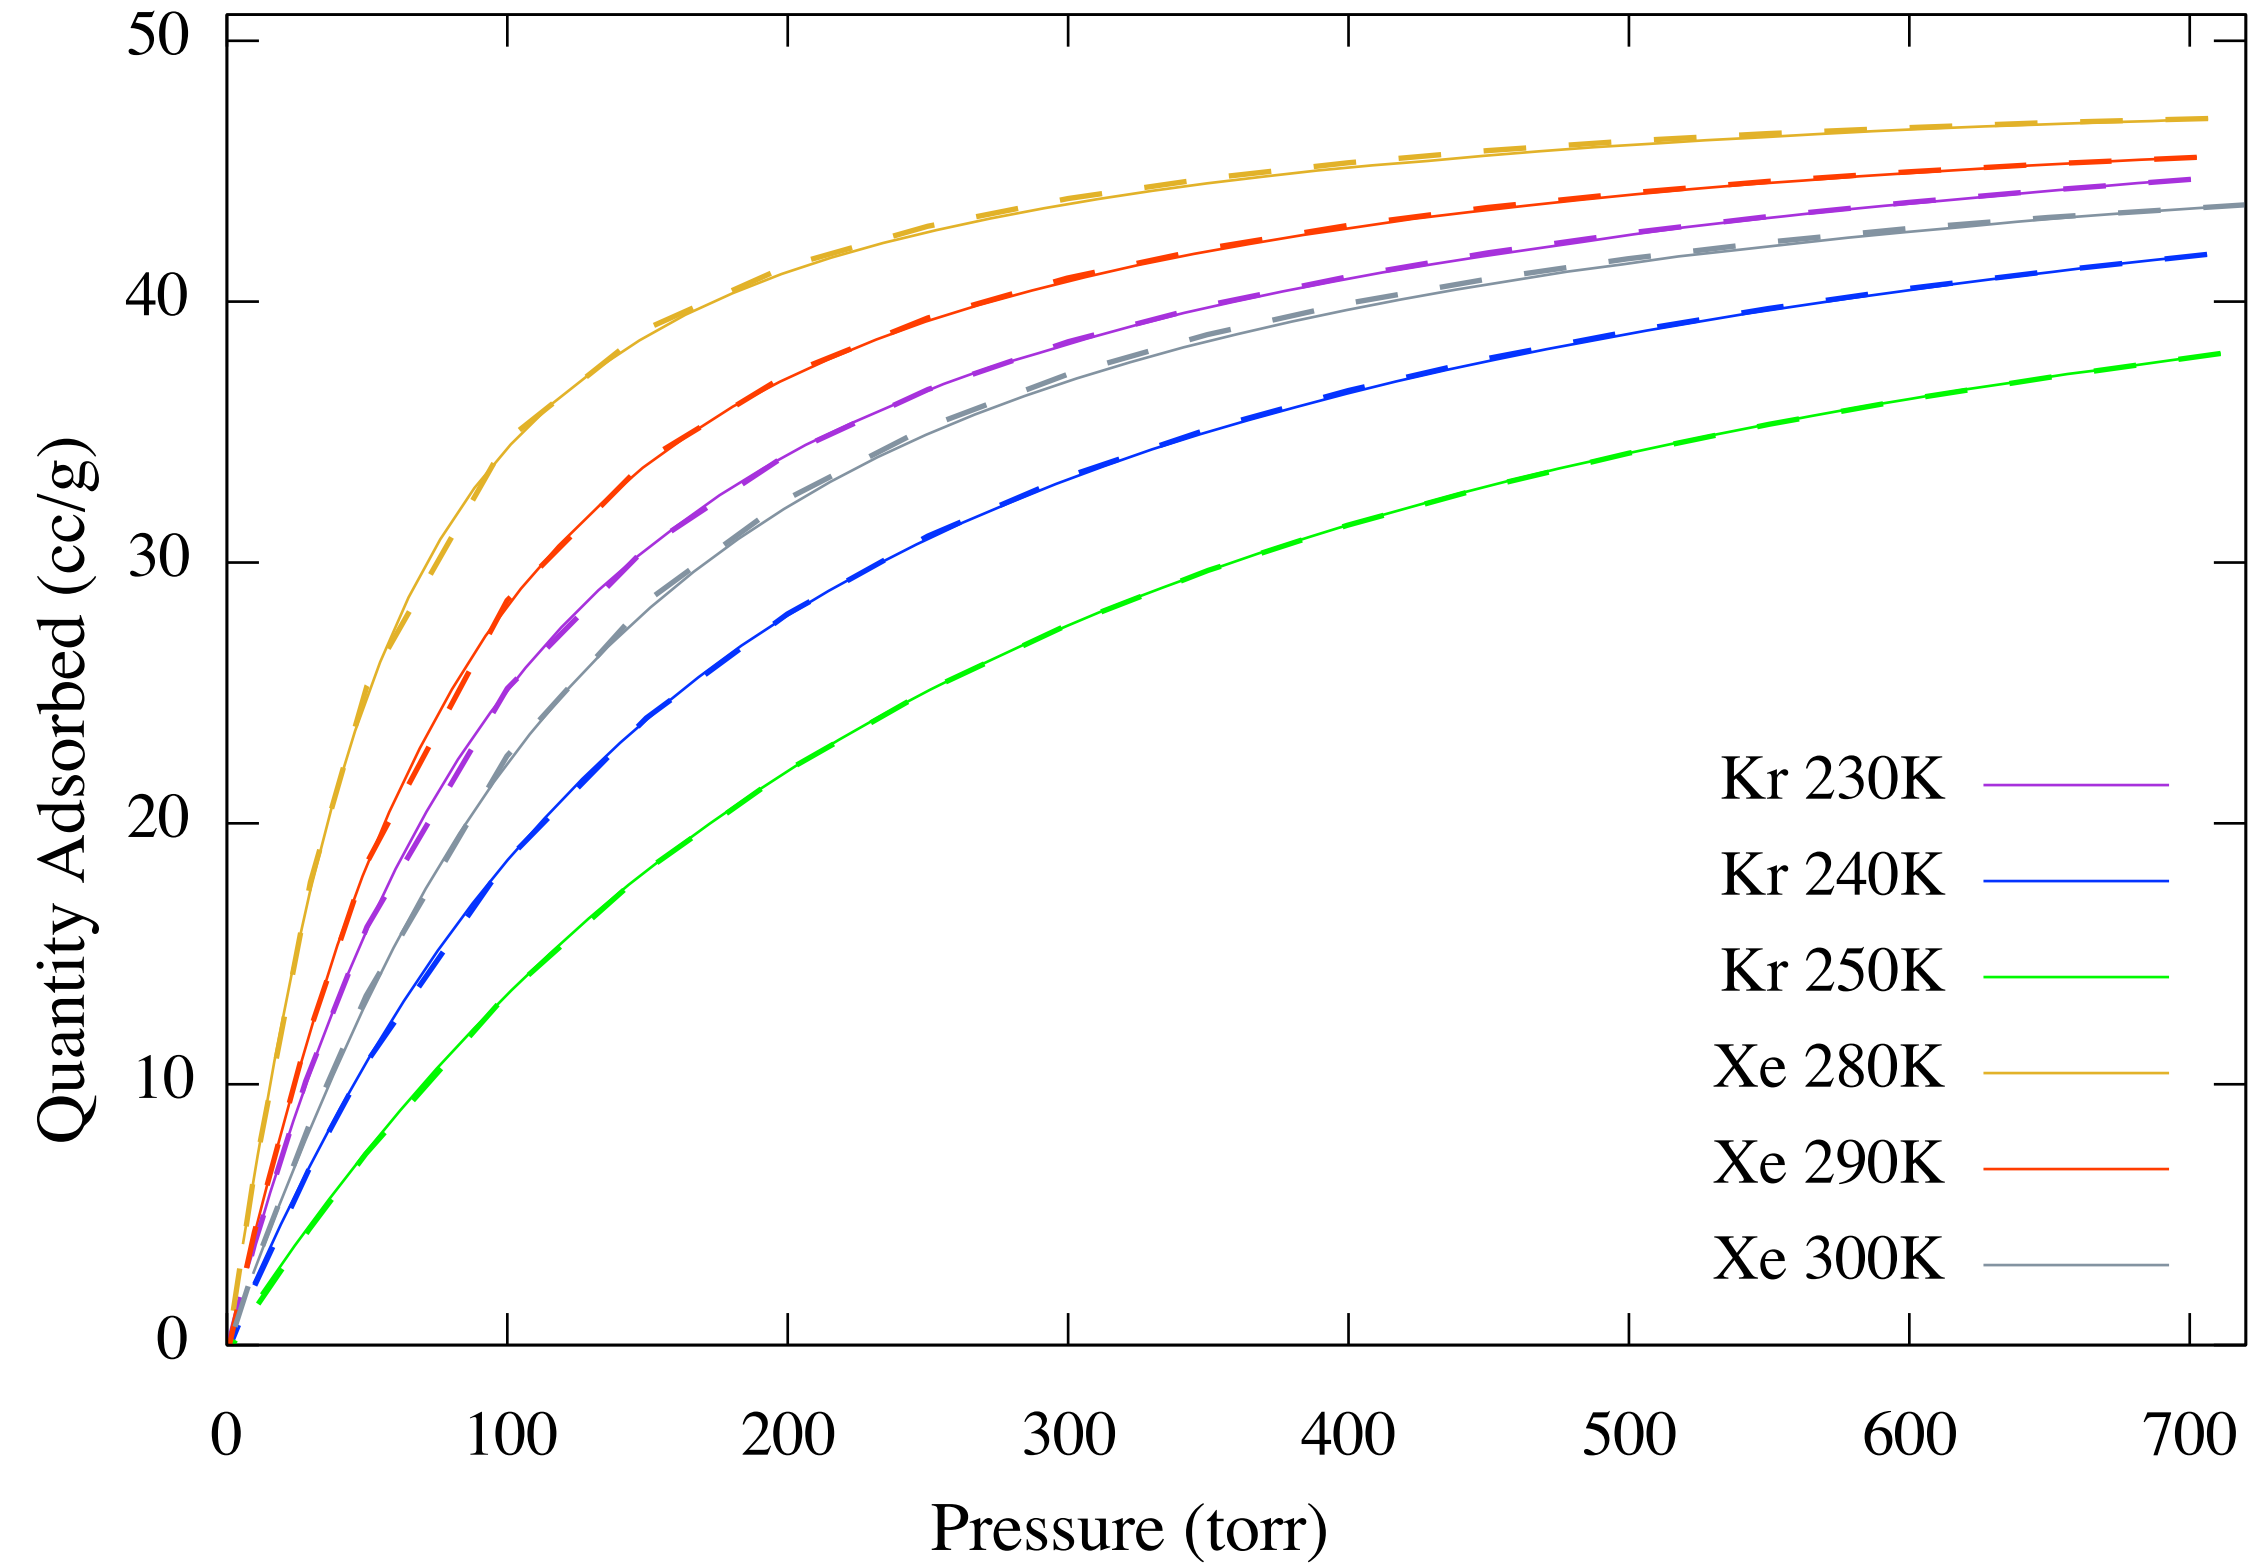

Supplement: c3cc44374d_2.zip [file c3cc44374d_2.zip]
